# Supplementary material for: CD40 signaling instructs chronic lymphocytic leukemia cells to attract monocytes via the CCR2 axis
Source: PubMed Central journal article supplement — Haematologica. 2017 Sep 29;102(12):2069–76. doi: 10.3324/haematol.2016.157206 (PMC5709106; doi:10.3324/haematol.2016.157206), 2017-12
Supplement: 2016_157206-Disclosures_and_Contributions.pdf [file 2016_157206-Disclosures_and_Contributions.pdf]

Haematologica  
HAEMATOL/2016/157206  
Version 4

CD40 signaling instructs chronic lymphocytic leukemia cells to attract monocytes via the CCR2 axis

Martijn H. A. van Attekum, Jaco A. C. van Bruggen, Erik Slinger, M. Cristina Lebre, Emilie Reinen, Sabina Kersting, Eric Eldering, and Arnon P. Kater

Disclosures: The authors declare no conflict of interest

Contributions: MHAvA designed and performed experiments and wrote the manuscript. MCL aided with and designed migration experiments, ES designed and performed immunofluorescence experiments, ER performed differentiation experiments, SK provided patient samples and scientific input, EE and APK supervised the study and wrote the manuscript.
