# Supplementary material for: CD40 signaling instructs chronic lymphocytic leukemia cells to attract monocytes via the CCR2 axis
Source: PubMed Central journal article supplement — Haematologica. 2017 Sep 29;102(12):2069–76. doi: 10.3324/haematol.2016.157206 (PMC5709106; doi:10.3324/haematol.2016.157206), 2017-12

# CD40 signaling instructs chronic lymphocytic leukemia cells to attract monocytes via the CCR2 axis

Model of CLL - T cell - macrophage triad in the formation of a supportive tumor microenvironment

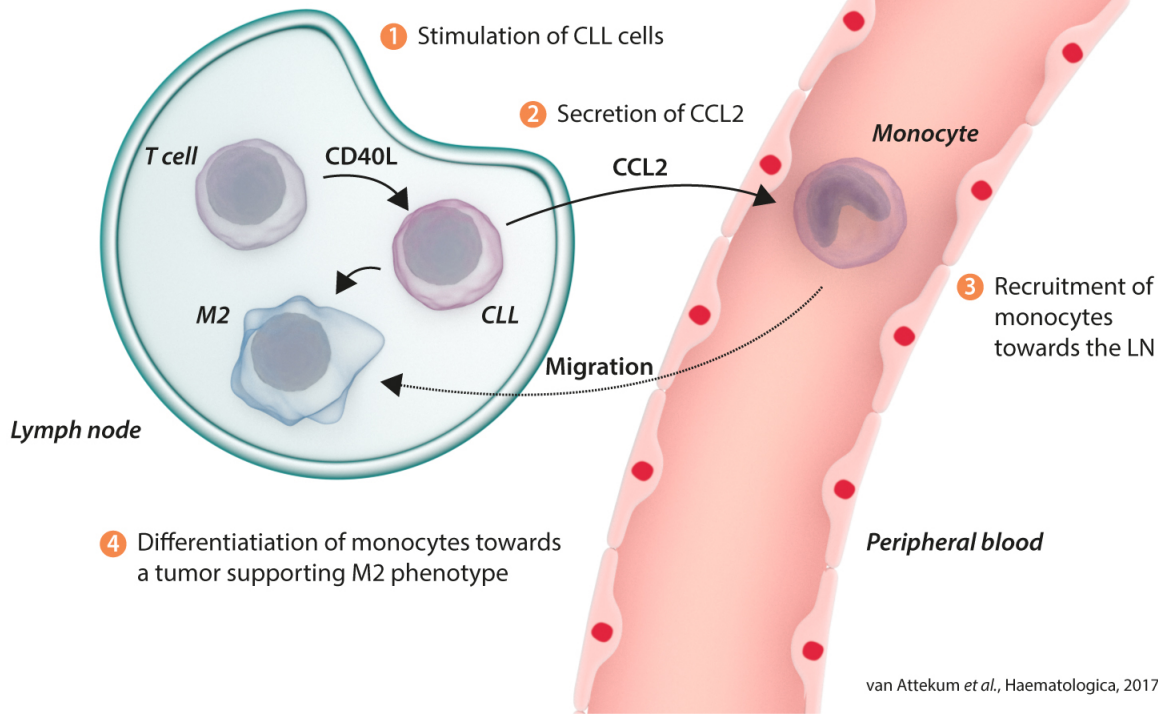

Supplement: HAEMATOL-2016-157206v4-van_Attekum-01.pdf [file HAEMATOL-2016-157206v4-van_Attekum-01.pdf]
